# Supplementary material
Source: PubMed Central journal article supplement (PMC5247670)

# Supplemental data

## Basic residues of $\beta$ -Sheet A contribute to heparin binding and activation of human serpinA12 (vaspin)\*

David Ulbricht<sup>1</sup>, Kathrin Oertwig<sup>1</sup>, Kristin Arnsburg<sup>1</sup>, Anja Saalbach<sup>2</sup> and John T. Heiker<sup>1</sup>

<sup>1</sup>Institute of Biochemistry, Faculty of Biosciences, Pharmacy and Psychology, University of Leipzig, 04103 Leipzig, Germany

<sup>2</sup>Department of Dermatology, Venerology and Allergology, University of Leipzig, 04103 Leipzig, Germany

### Supplemental Figure 1

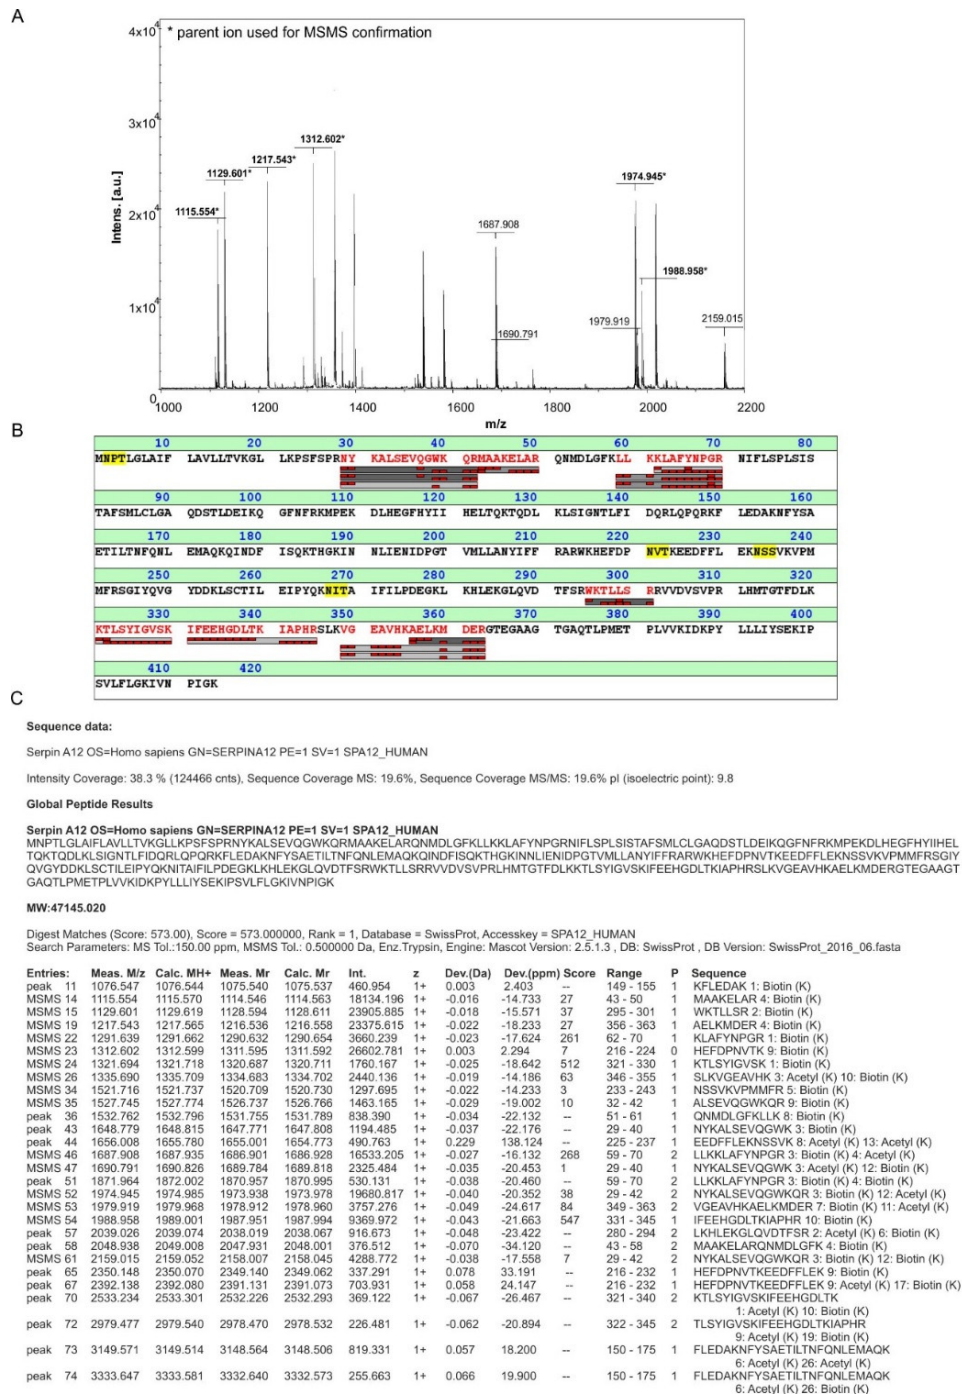

**Supplemental Figure 1.** (A) A representative mass spectrum of the isolated biotinylated peptides after selective labelling and tryptic digestion. (B) Sequence of human vaspin and sequence coverage of peaks analyzed by MSMS. (C) Example of Mascot Server search result using combined MS and MSMS peaks.

# Spectrum Analysis Report

## Supplementary Spectrum S1

|                  |                   |          |                     |        |                  |          |
|------------------|-------------------|----------|---------------------|--------|------------------|----------|
| Sequence Name:   | Parentmass:       | 1312.602 | Mass Error:         | -0.027 | MH+ (mono):      | 1312.629 |
| MH+ (avg):       | Threshold (a.i.): | 0.000    | Tolerance (Da):     | 0.500  | Number of Peaks: | 88       |
| Above Threshold: | Assigned Peaks:   | 28       | Not assigned Peaks: | 60     |                  |          |

Abs. Int. \* 1000

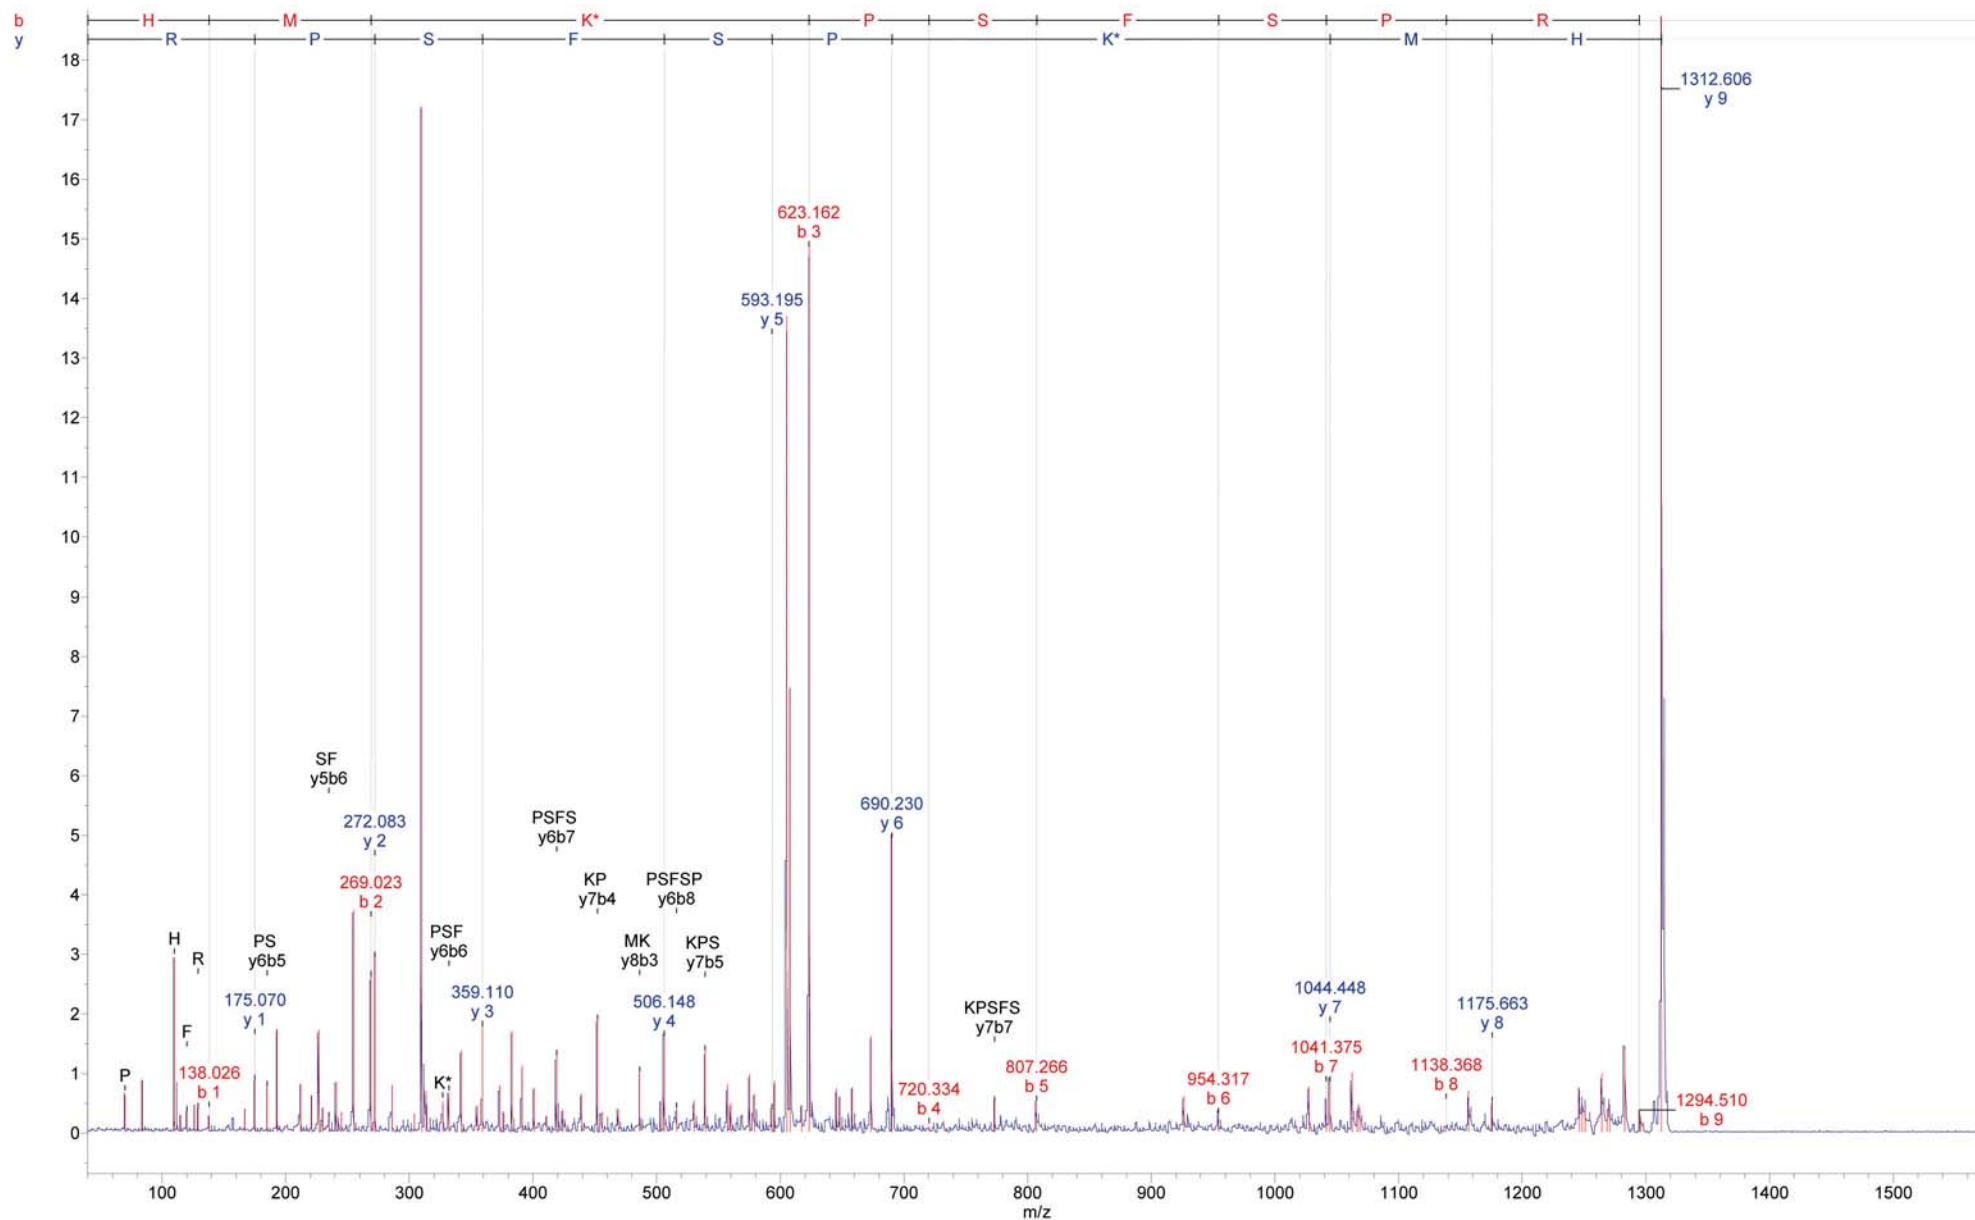

# Spectrum Analysis Report

## Supplementary Spectrum S2

|                      |                         |                        |                      |
|----------------------|-------------------------|------------------------|----------------------|
| Sequence Name:       | Parentmass:             | Mass Error:            | MH+ (mono):          |
| MH+ (avg): 1976.244  | 1974.945                | -0.041                 | 1974.986             |
| Above Threshold: 126 | Threshold (a.i.): 0.000 | Tolerance (Da): 0.500  | Number of Peaks: 126 |
|                      | Assigned Peaks: 31      | Not assigned Peaks: 95 |                      |

Abs. Int. \* 1000

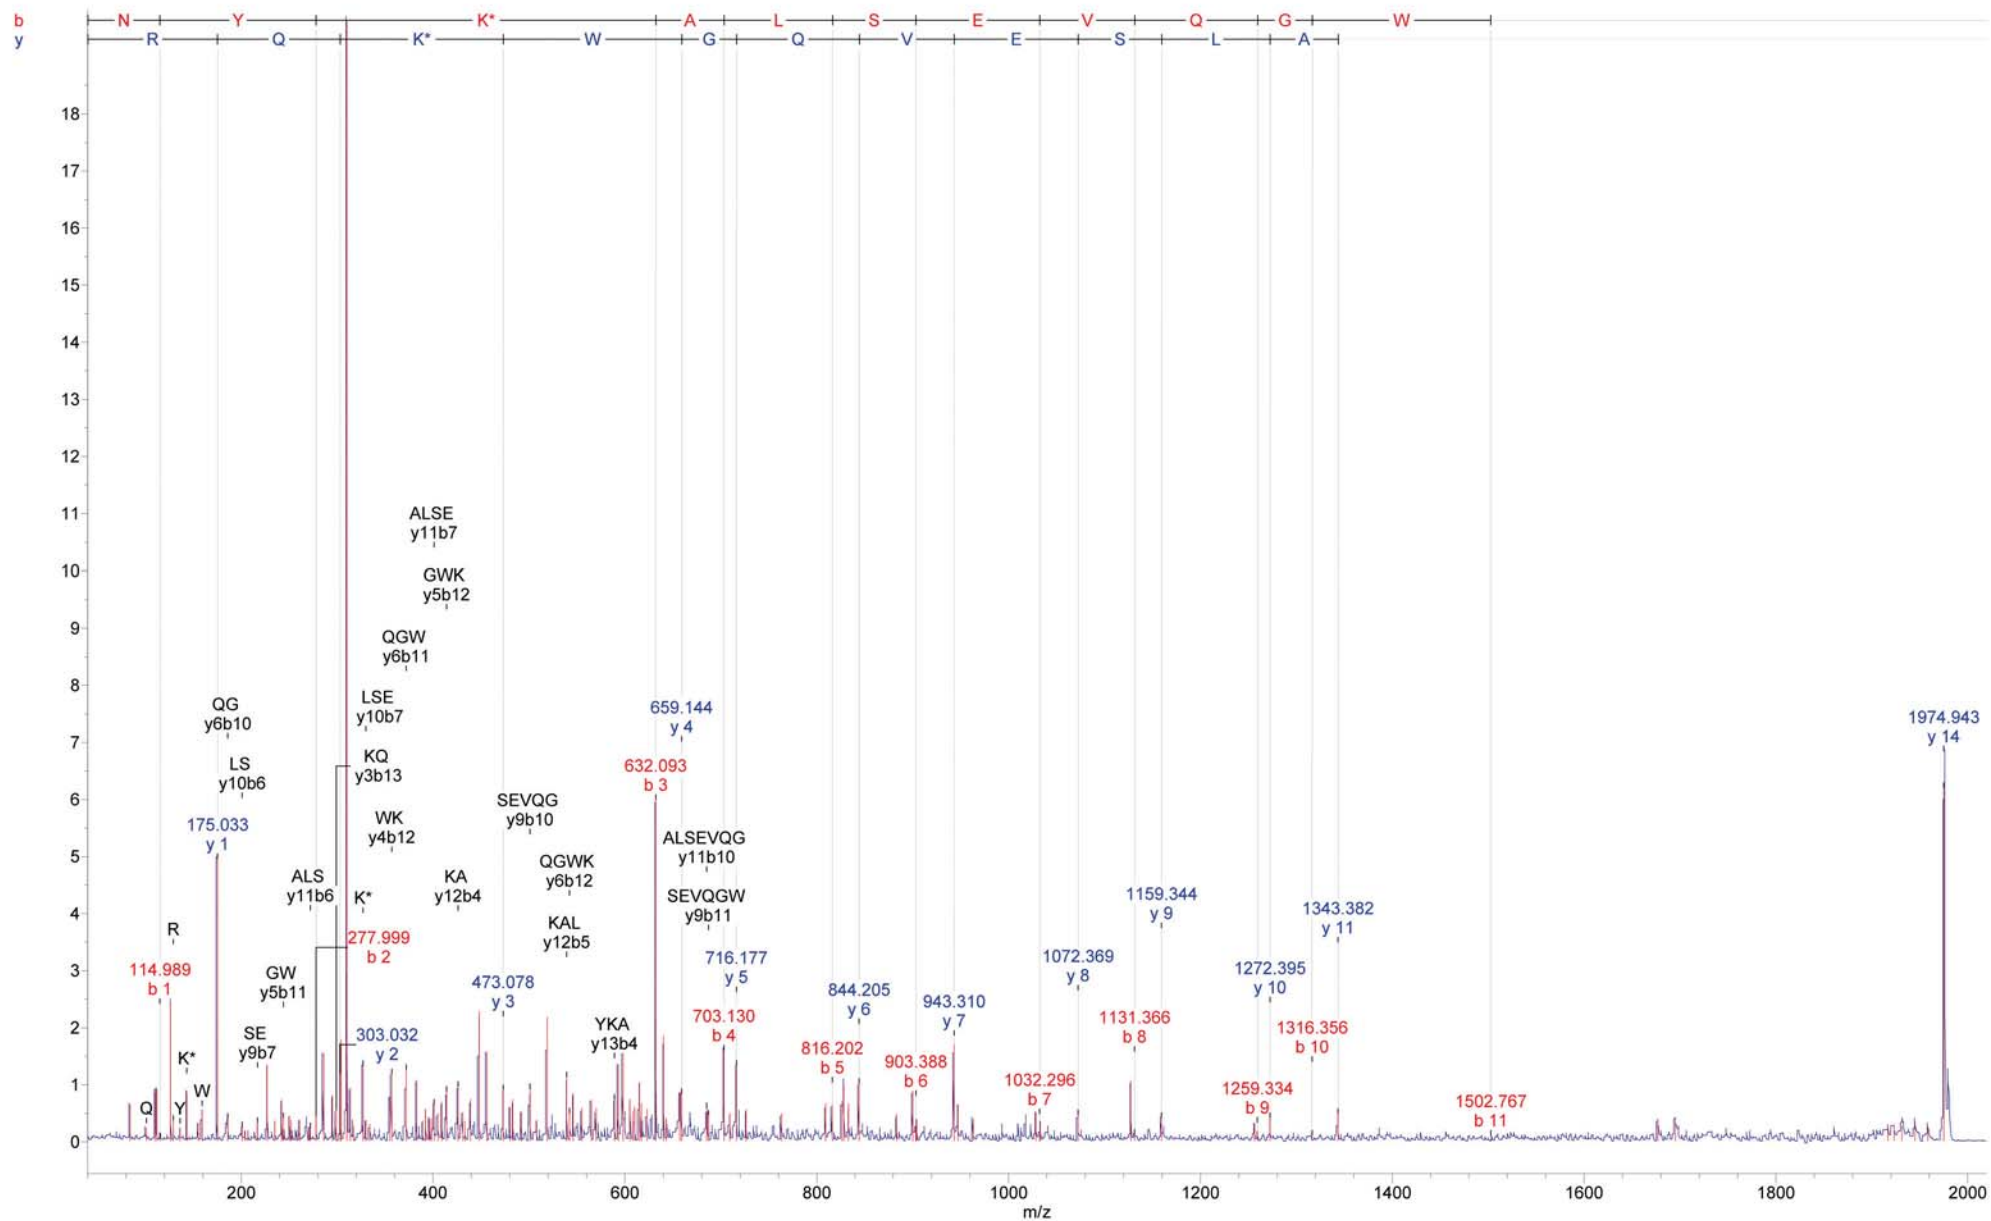

Spectrum Analysis Report

Supplementary Spectrum S3

|                  |                   |          |                     |        |                  |          |
|------------------|-------------------|----------|---------------------|--------|------------------|----------|
| Sequence Name:   | Parentmass:       | 1115.554 | Mass Error:         | -0.017 | MH+ (mono):      | 1115.571 |
| MH+ (avg):       | Threshold (a.i.): | 0.000    | Tolerance (Da):     | 0.500  | Number of Peaks: | 71       |
| Above Threshold: | Assigned Peaks:   | 22       | Not assigned Peaks: | 49     |                  |          |

Abs. Int. \* 1000

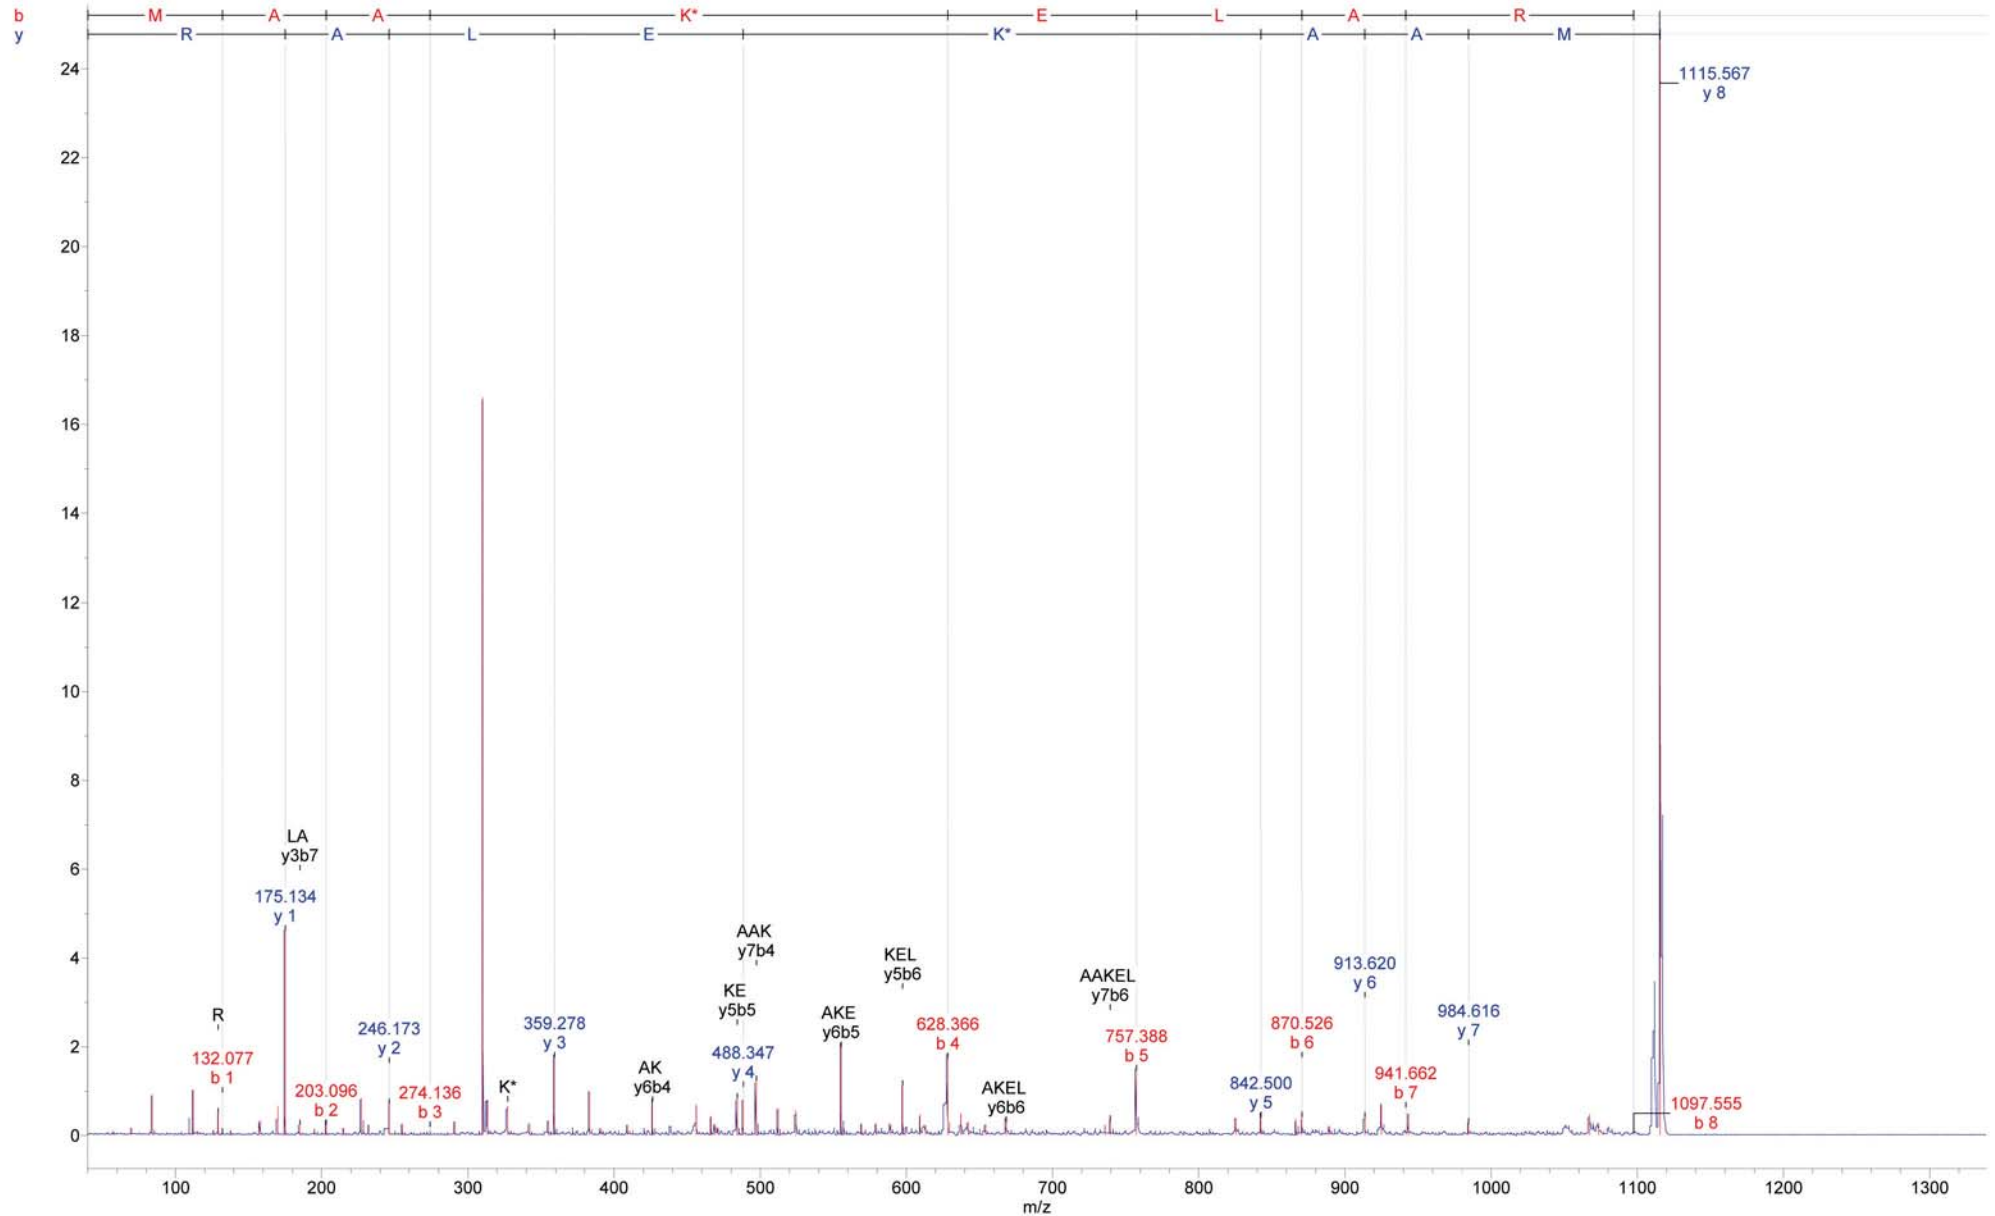

Spectrum Analysis Report

Supplementary Spectrum S4

|                 |          |                     |          |                   |       |
|-----------------|----------|---------------------|----------|-------------------|-------|
| Sequence Name:  |          | Parentmass:         | 1291.723 | Mass Error:       | 0.061 |
| MH+ (mono):     | 1291.662 | MH+ (avg):          | 1292.532 | Threshold (a.i.): | 0.000 |
| Tolerance (Da): | 0.500    | Number of Peaks:    | 61       | Above Threshold:  | 61    |
| Assigned Peaks: | 23       | Not assigned Peaks: | 38       |                   |       |

Abs. Int. \* 1000

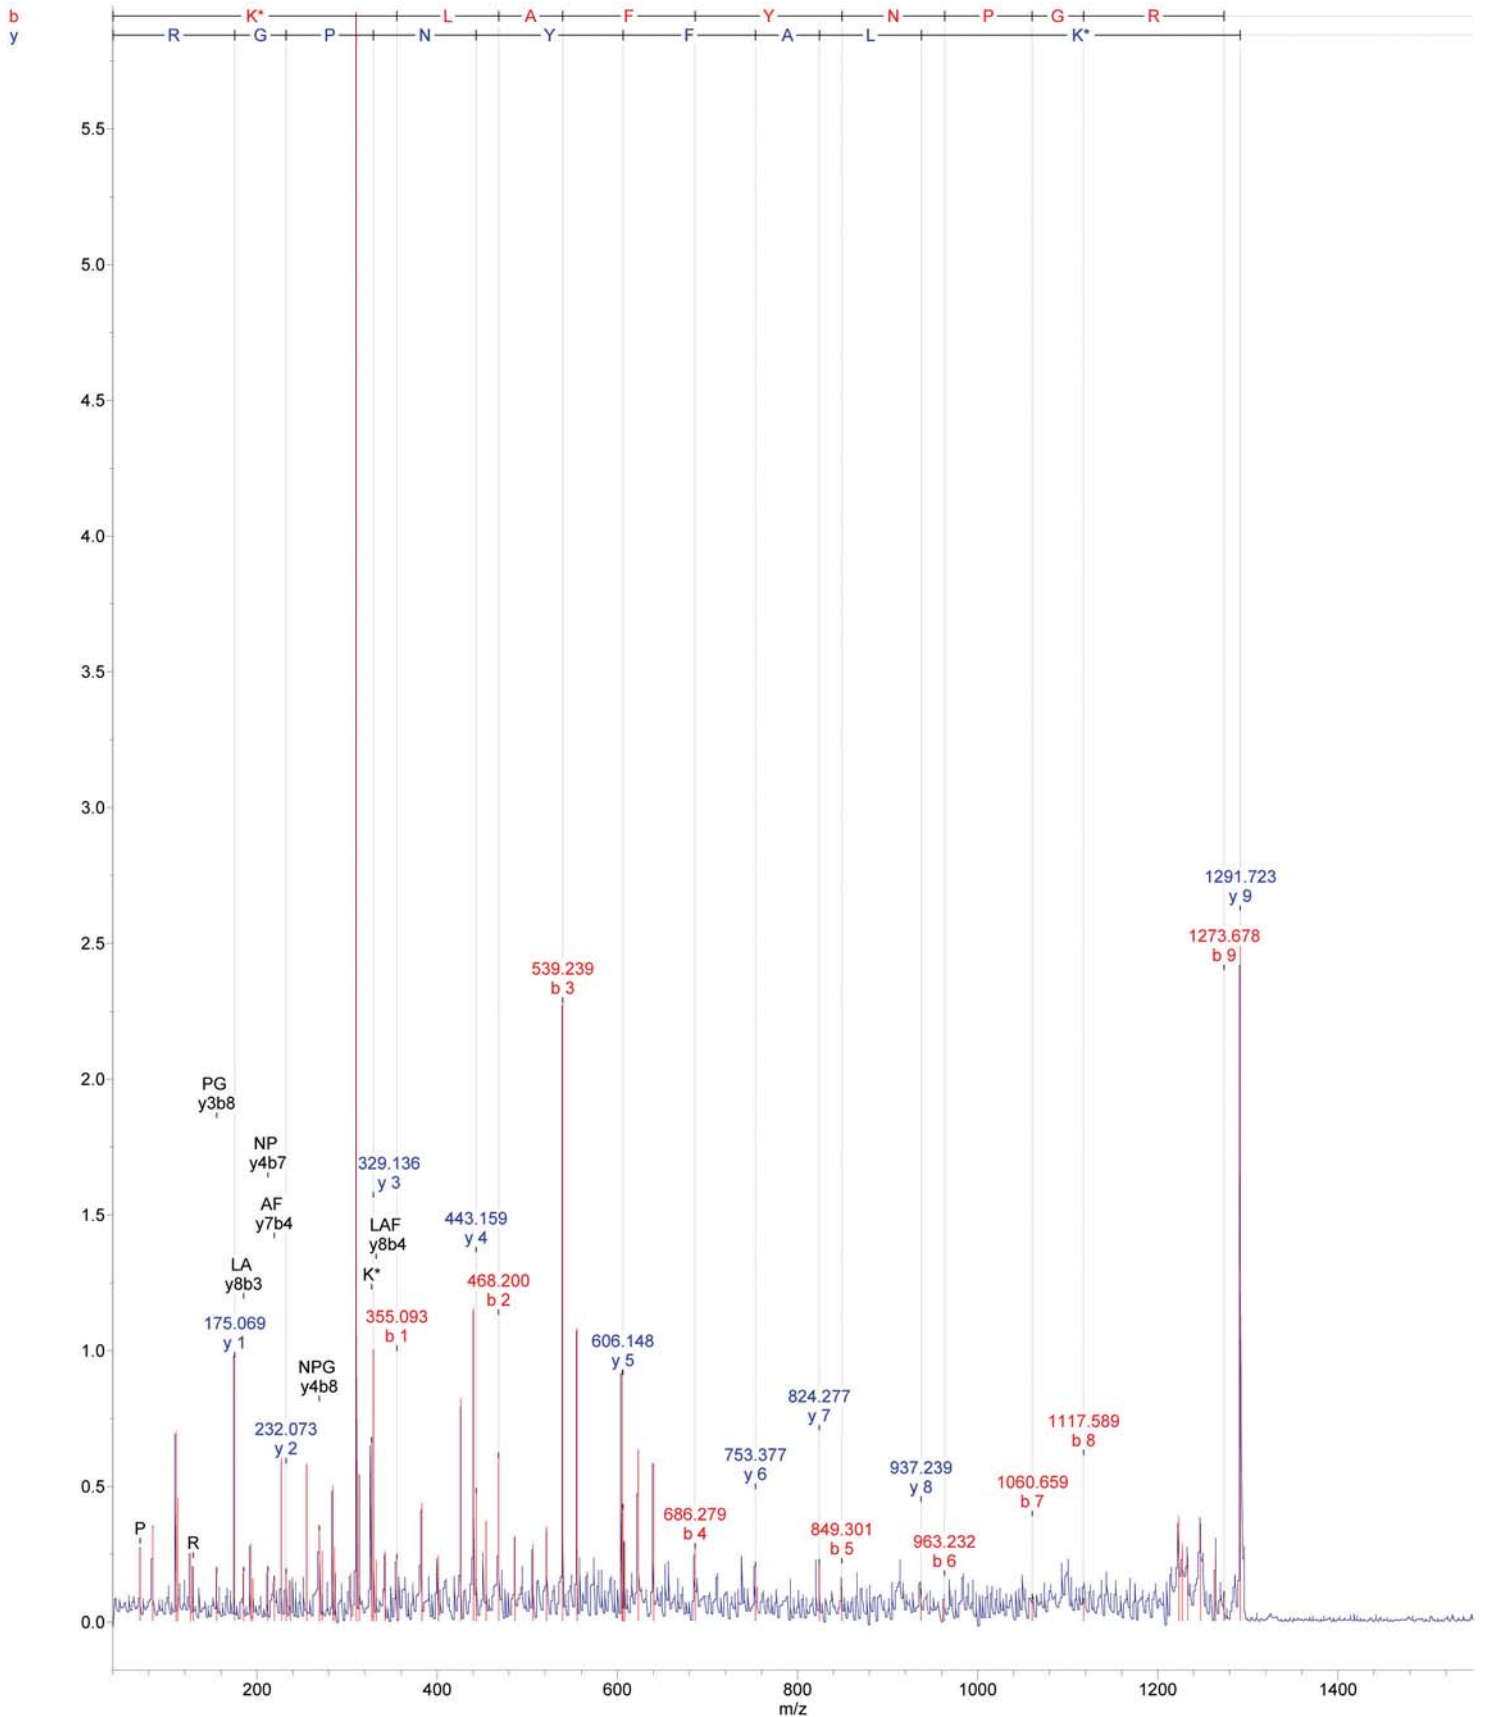

Spectrum Analysis Report

Supplementary Spectrum S5

Sequence Name:  
MH+ (avg):  
Above Threshold:

1130.387  
85

Parentmass:  
Threshold (a.i.):  
Assigned Peaks:

1129.601  
0.000  
19

Mass Error:  
Tolerance (Da):  
Not assigned Peaks:

-0.018  
0.500  
66

MH+ (mono):  
Number of Peaks:

1129.619  
85

Abs. Int. \* 1000

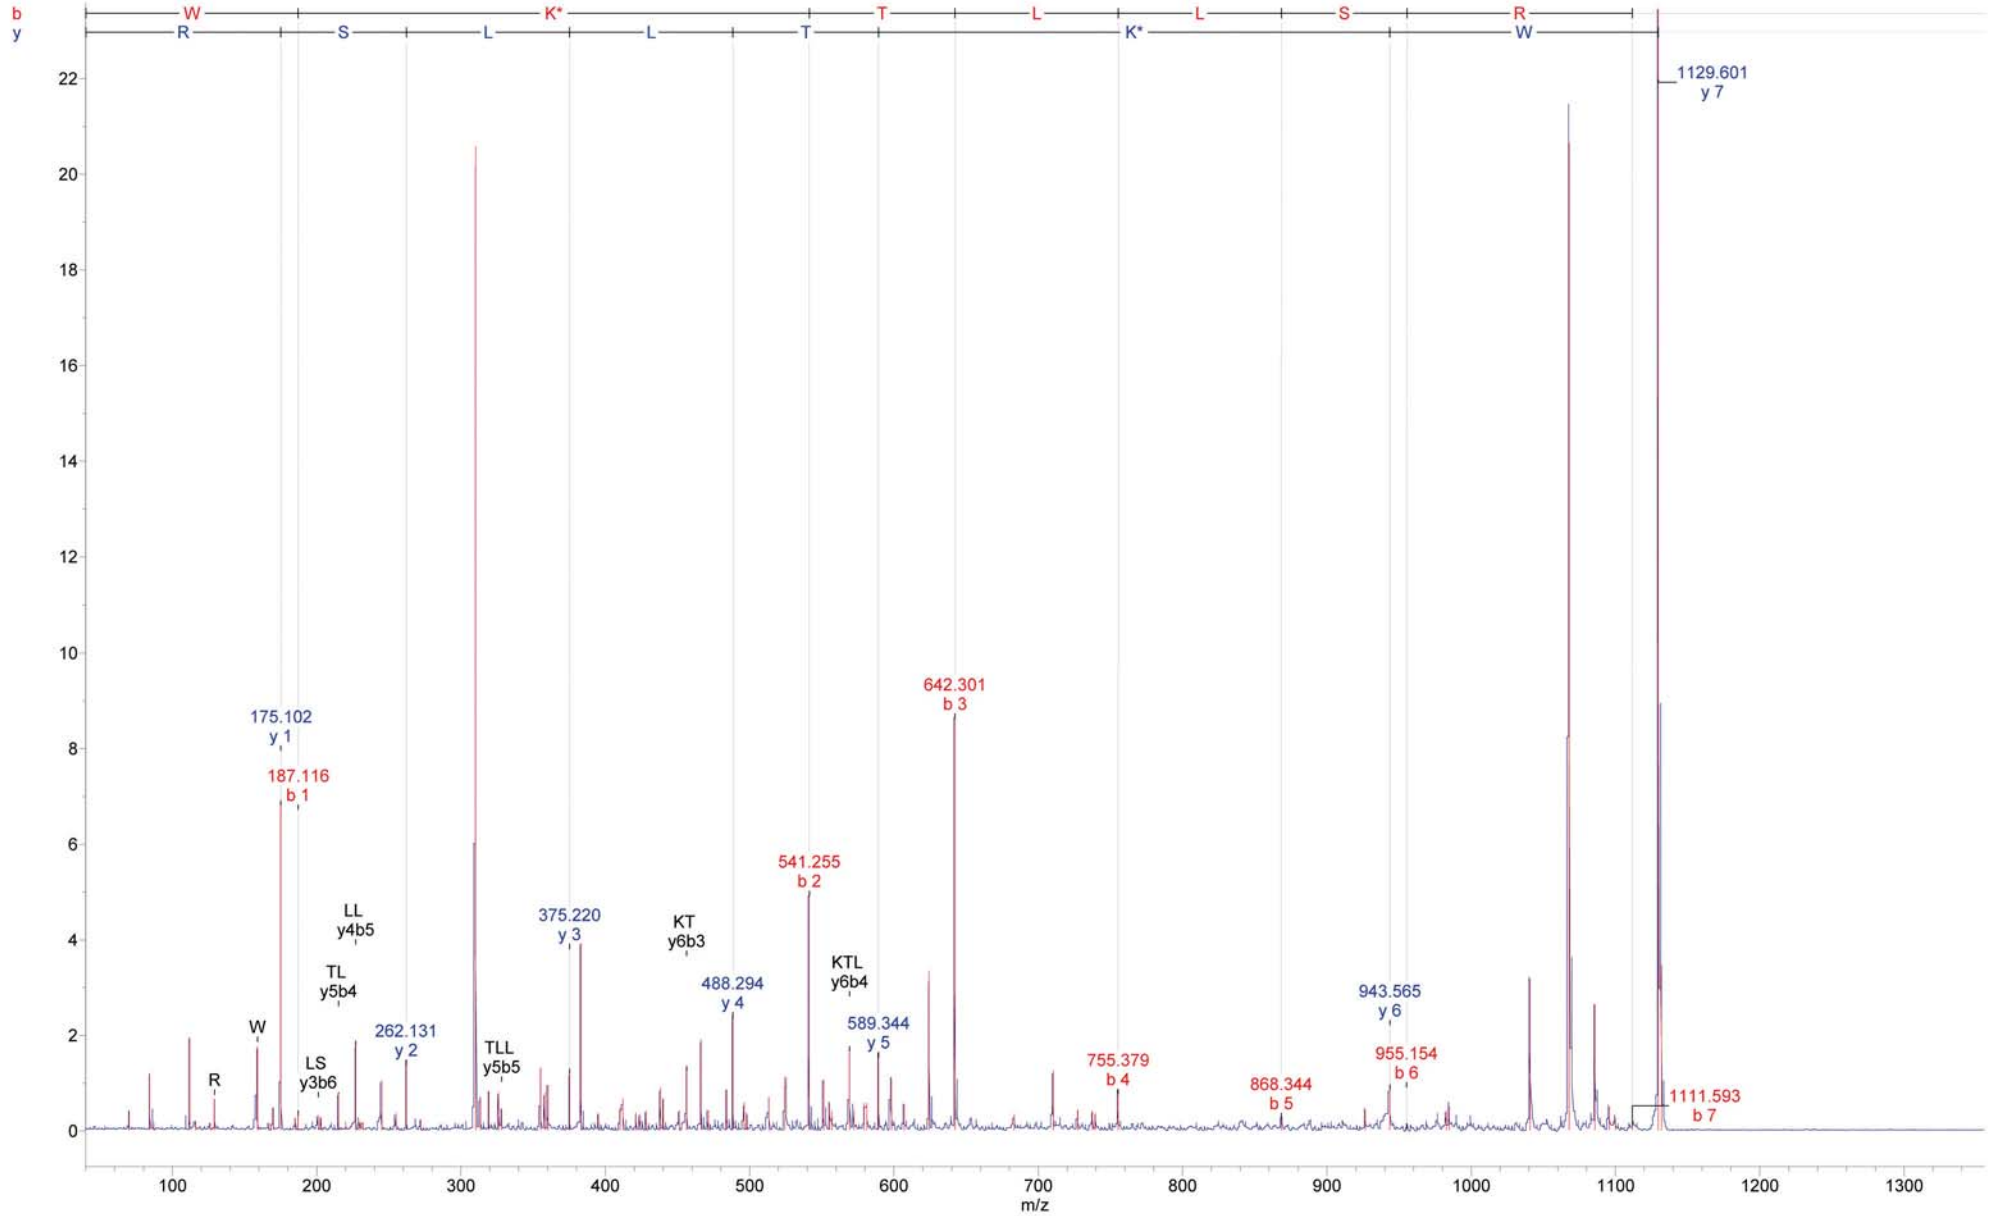

# Spectrum Analysis Report

## Supplementary Spectrum S6

Sequence Name:  
 MH+ (avg): 1322.597  
 Above Threshold: 93

Parentmass: 1321.694  
 Threshold (a.i.): 0.000  
 Assigned Peaks: 24

Mass Error: -0.025  
 Tolerance (Da): 0.500  
 Not assigned Peaks: 69

MH+ (mono): 1321.719  
 Number of Peaks: 93

Abs. Int. \* 1000

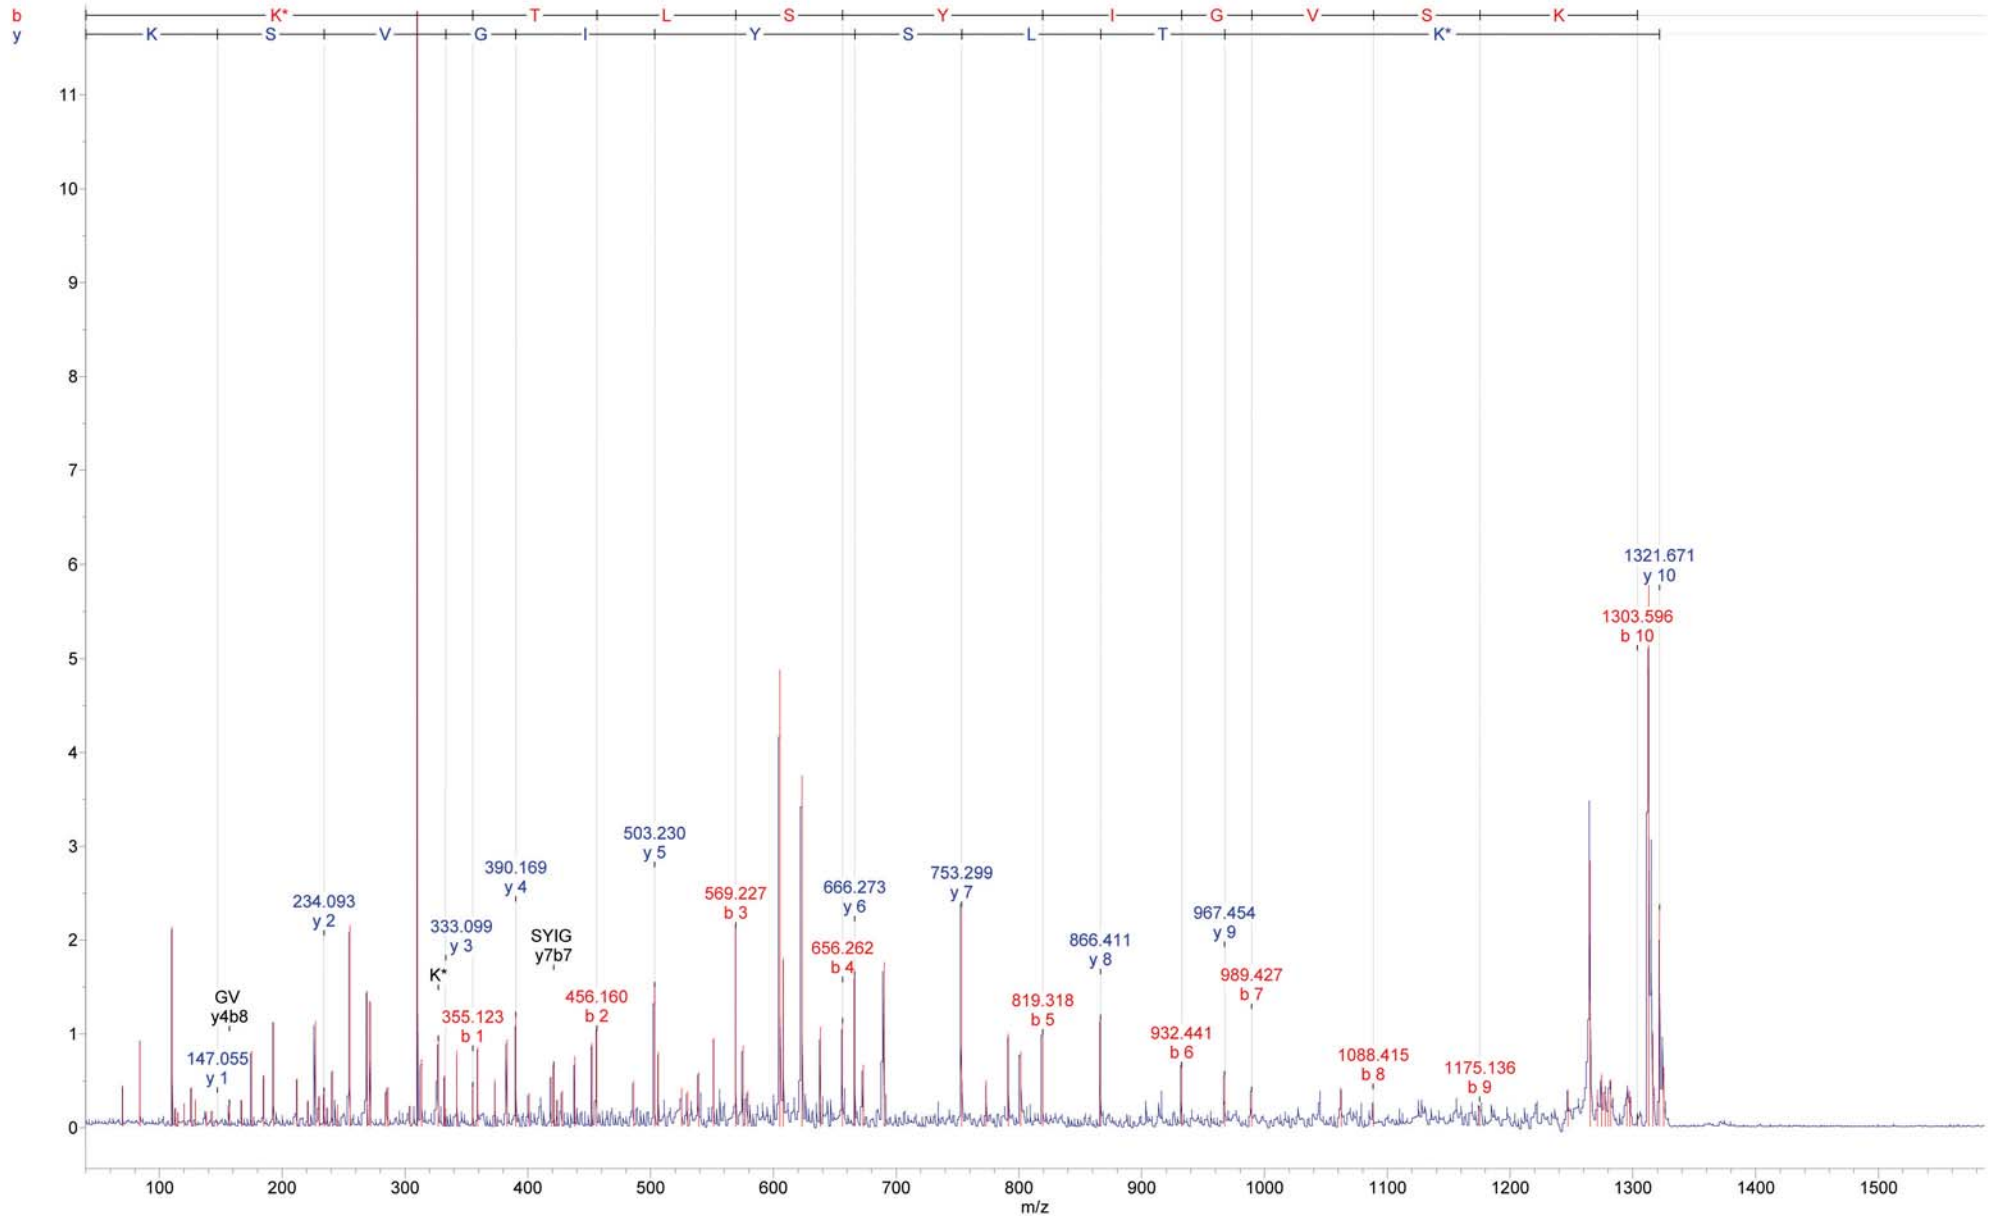

Spectrum Analysis Report

Supplementary Spectrum S7

|                  |                   |          |                     |        |                  |          |
|------------------|-------------------|----------|---------------------|--------|------------------|----------|
| Sequence Name:   | Parentmass:       | 1988.958 | Mass Error:         | -0.044 | MH+ (mono):      | 1989.002 |
| MH+ (avg):       | Threshold (a.i.): | 0.000    | Tolerance (Da):     | 0.500  | Number of Peaks: | 113      |
| Above Threshold: | Assigned Peaks:   | 36       | Not assigned Peaks: | 77     |                  |          |

Abs. Int. \* 1000

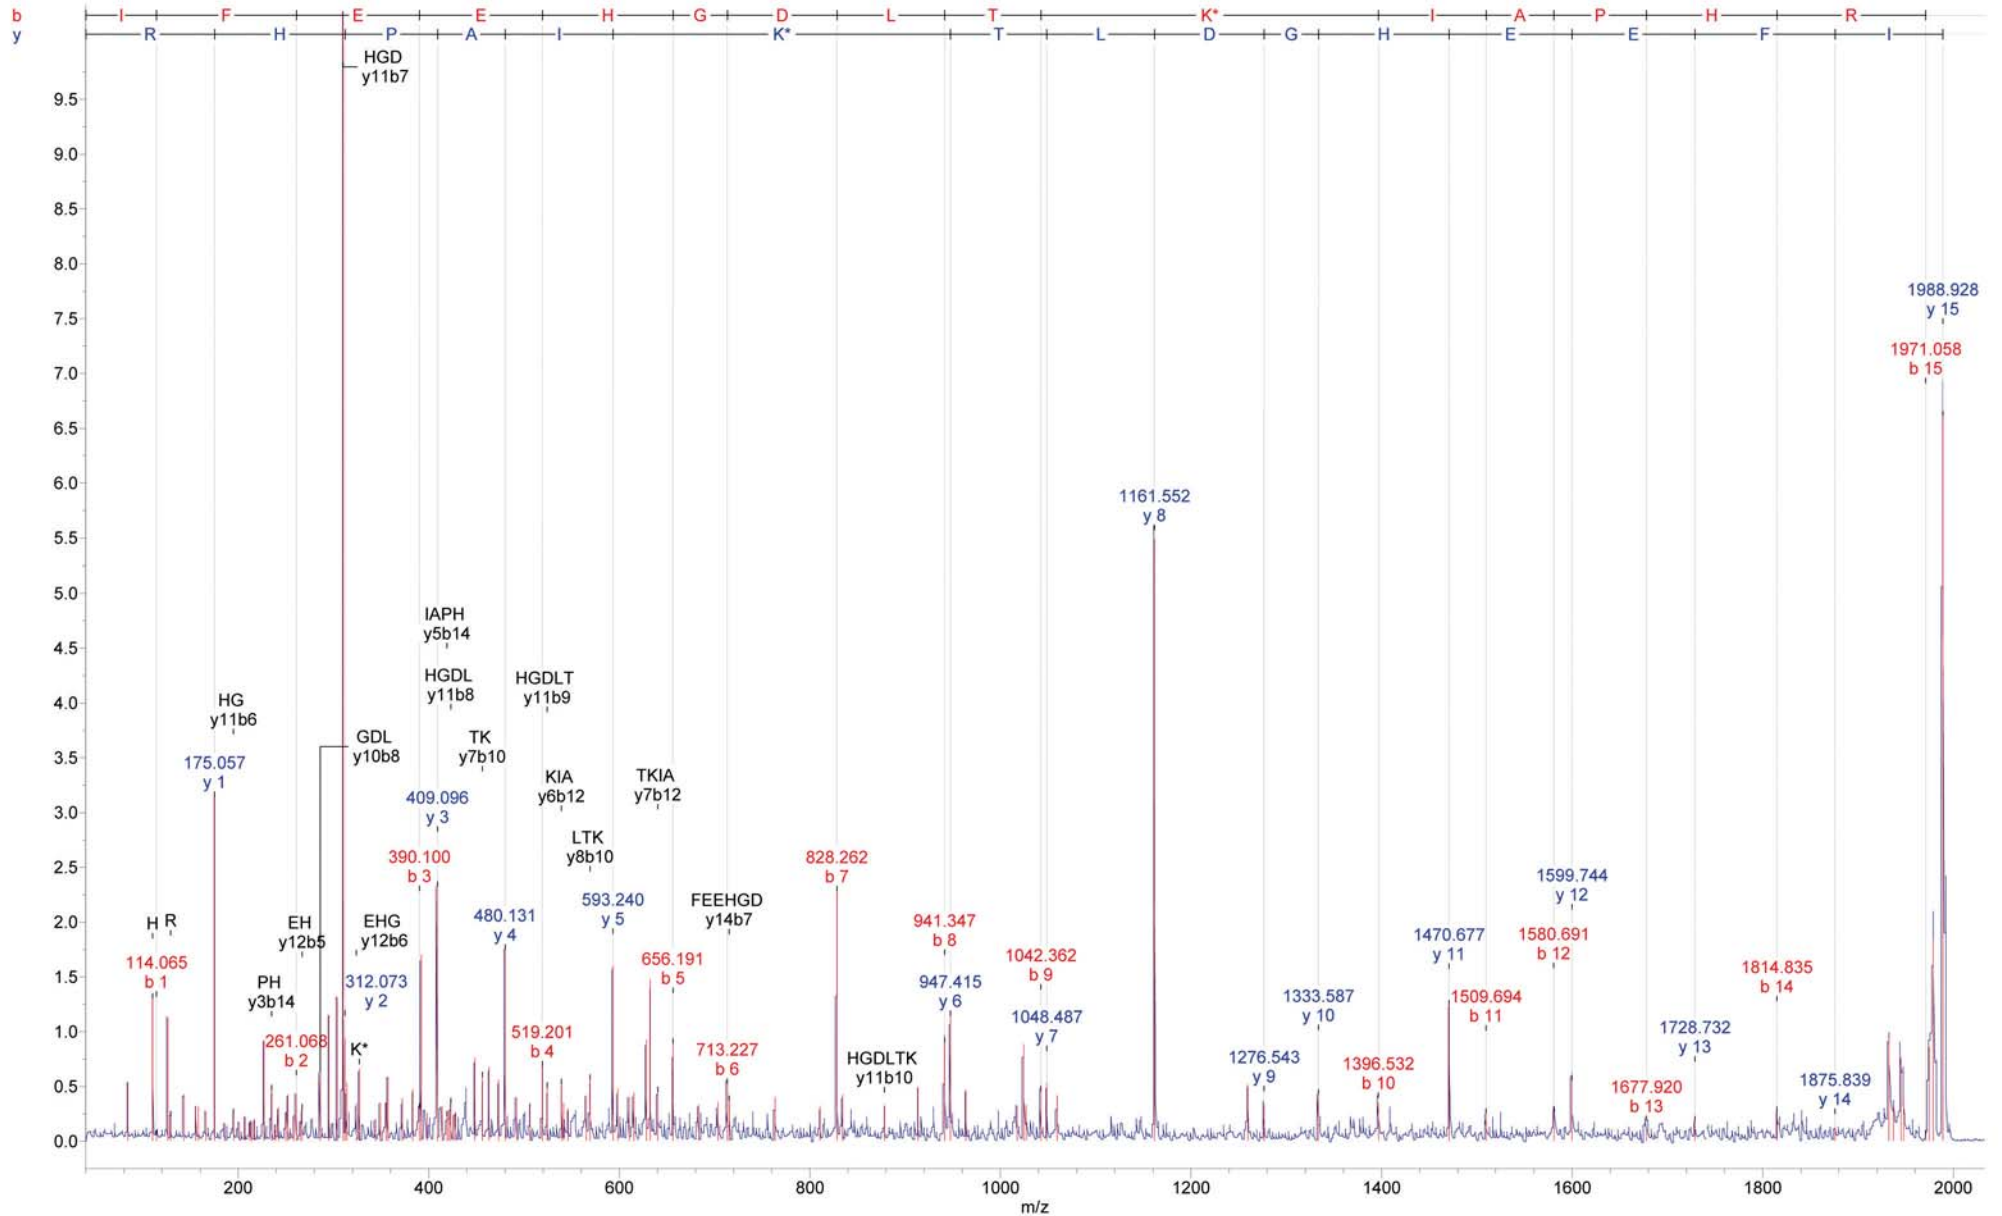



### Spectrum Analysis Report

#### Supplementary Spectrum S8

|                     |                         |                        |                     |
|---------------------|-------------------------|------------------------|---------------------|
| Sequence Name:      | Parentmass:             | Mass Error:            | MH+ (mono):         |
| MH+ (avg): 1218.428 | 1217.543                | -0.023                 | 1217.566            |
| Above Threshold: 59 | Threshold (a.i.): 0.000 | Tolerance (Da): 0.500  | Number of Peaks: 59 |
|                     | Assigned Peaks: 21      | Not assigned Peaks: 38 |                     |

Abs. Int. \* 1000

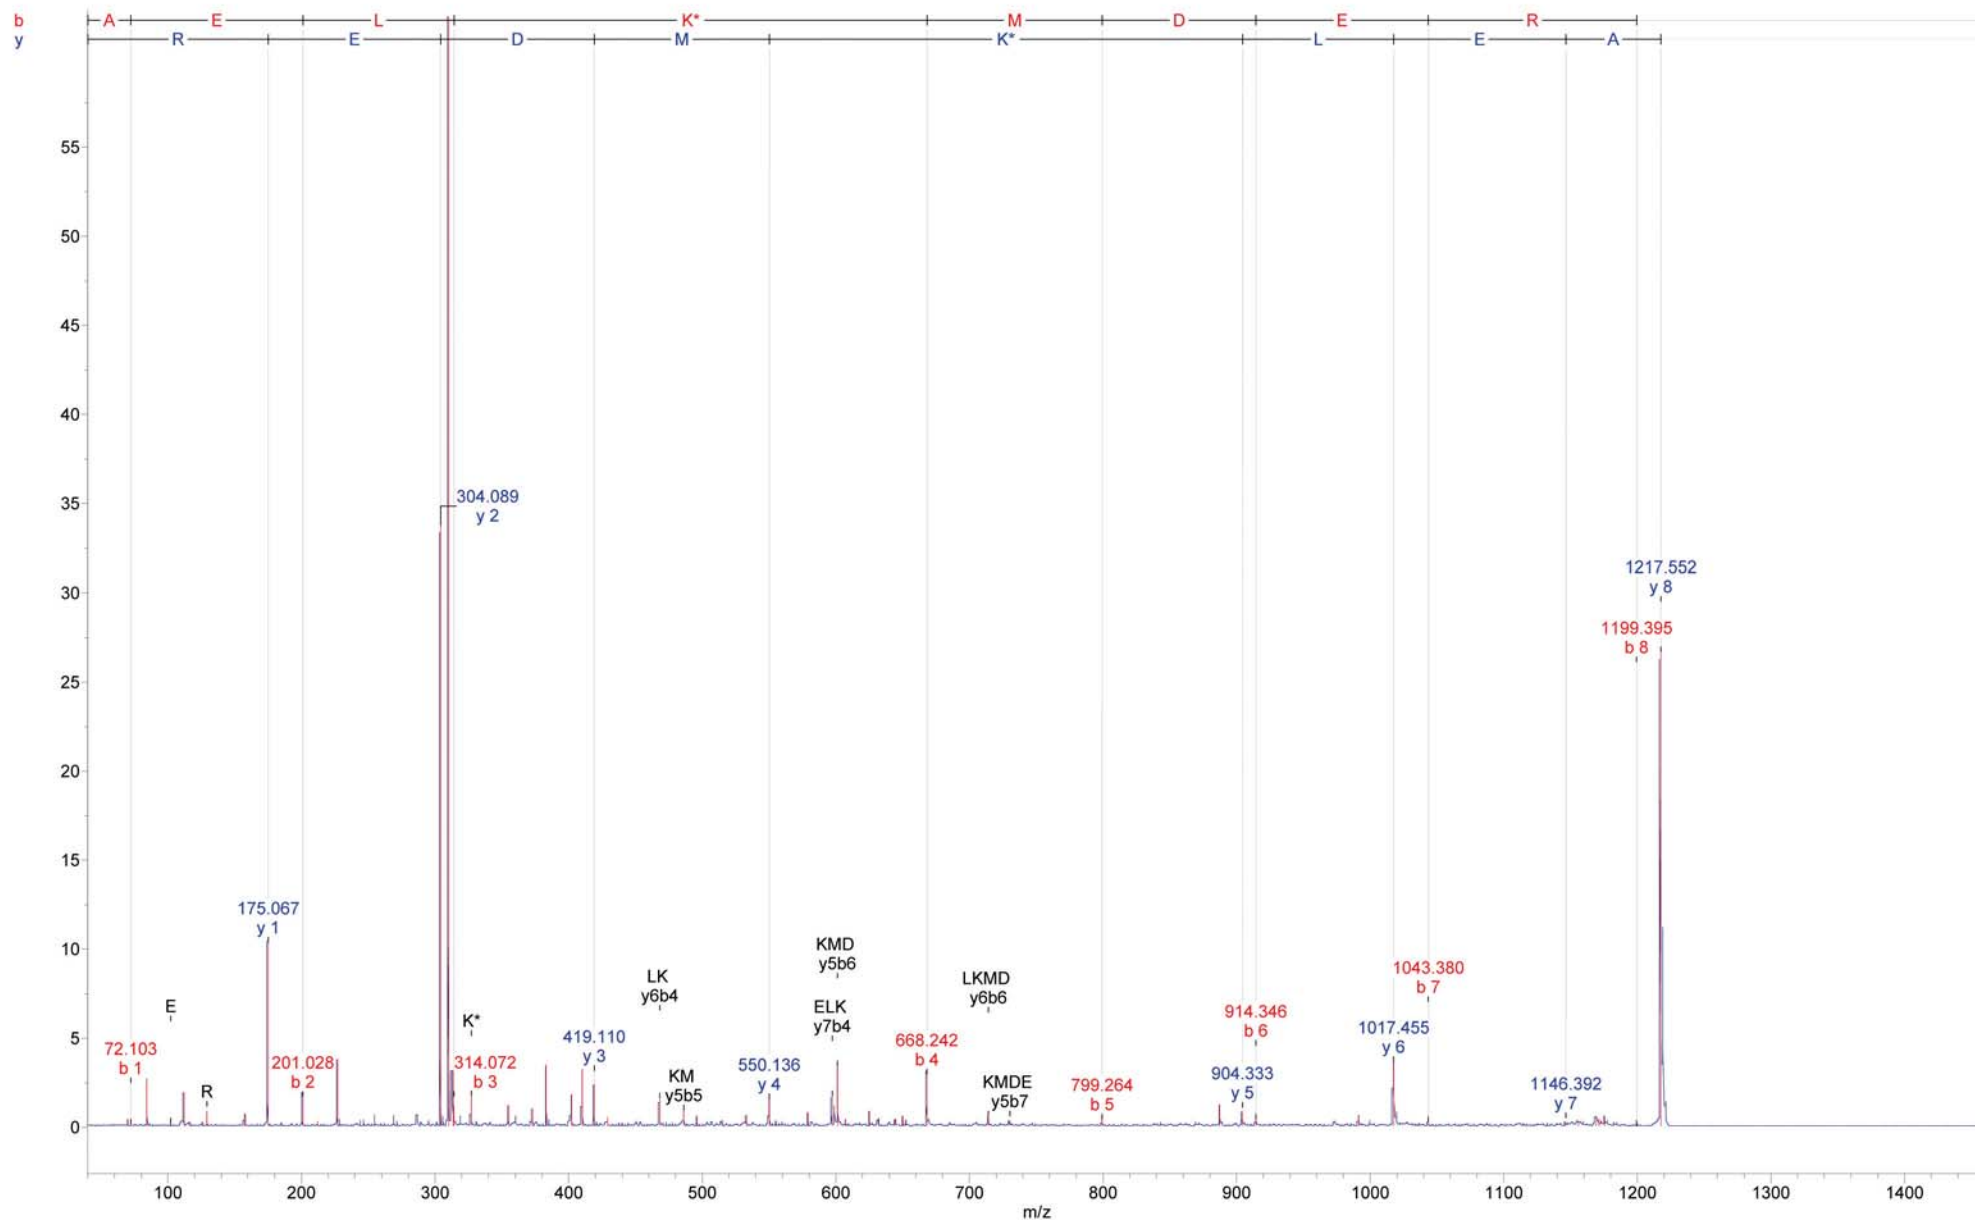

Supplement: 10.1074_M116.748020_jbc.M116.748020-1.pdf [file 10.1074_M116.748020_jbc.M116.748020-1.pdf]
